# Supplementary material
Source: Royal Society of Chemistry journal article supplement (https://www.rsc.org/suppdata/p2/1999/1791/900168i.doc)
Supplement: Supplementary file 1 [file 900168i.doc]

**Supporting Information**

**Conformational Interconversions of Partially Dehydroxylated Calix[4]arenes. A Molecular Mechanics Study**

Iris Thondorf*

Fachbereich Biochemie/Biotechnologie, Martin-Luther-Universität Halle-Wittenberg, Kurt-Mothes-Str.3, D-06099 Halle, Germany

**Abstract**

The rotational pathways of the cone  cone topomerisation for a series of dehydroxylated calix[4]arenes **2**-**5** have been calculated using the MM3 force field. The key intermediates and rate-limiting steps have been identified and characterised. The low barriers obtained for phenyl residue rotation suggest that the compounds should be partially flexible at low temperatures. The results are discussed in relation to available experimental data.

**Table S1.** Energy contributions*a* (in kcal mol-1) of the transition state structures of **2-5** calculated with the MM3 force field

| compd | ring flips involving a phenol ring | ring flips involving a phenyl ring | Etotal | E | Erel | Ecomp | Ebend | Ebb | Esb | Etors | Ets | E14vdW | EvdW | Edipol |
| --- | --- | --- | --- | --- | --- | --- | --- | --- | --- | --- | --- | --- | --- | --- |
| **2** | conepaco(dist) |  | 35.66 | 12.58 | 12.58 | 5.64 | 10.48 | -0.02 | -0.68 | -36.49 | -0.01 | 41.68 | -2.36 | 17.42 |
|  | conepaco(prox) |  | 33.30 | 10.23 | 10.23 | 6.03 | 11.16 | -0.04 | -0.71 | -37.83 | -0.01 | 41.64 | -4.98 | 18.04 |
|  | paco(H)1,2-alt |  | 31.54 | 8.46 | 6.03 | 6.12 | 9.15 | -0.17 | -0.79 | -38.38 | -0.01 | 41.63 | -3.54 | 17.53 |
|  | paco(H)1,3-alt |  | 36.79 | 13.72 | 11.28 | 5.79 | 9.11 | -0.13 | -0.71 | -35.73 | -0.02 | 41.75 | -1.41 | 18.14 |
|  | paco(prox)1,2-alt |  | 33.72 | 10.64 | 6.98 | 5.71 | 8.35 | -0.17 | -0.73 | -35.97 | -0.01 | 41.04 | -1.05 | 16.56 |
|  | paco(prox)1,3-alt |  | 36.34 | 13.26 | 9.60 | 5.74 | 9.39 | -0.11 | -0.71 | -33.50 | -0.01 | 41.59 | -3.32 | 17.27 |
|  | 1,2-altpaco(dist) |  | 34.52 | 11.45 | 5.90 | 5.67 | 9.17 | -0.11 | -0.74 | -33.73 | -0.01 | 41.32 | -4.02 | 16.97 |
|  |  | conepaco(H) | 27.96 | 4.88 | 4.88 | 5.66 | 9.17 | -0.14 | -0.77 | -37.96 | -0.01 | 42.17 | -7.00 | 16.86 |
|  |  | paco(prox)1,2-alt | 30.53 | 7.45 | 3.79 | 5.79 | 9.71 | -0.11 | -0.74 | -37.75 | -0.01 | 41.72 | -4.50 | 16.42 |
|  |  | paco(dist)1,3-alt | 33.79 | 10.72 | 3.73 | 5.59 | 8.45 | -0.17 | -0.74 | -35.22 | -0.02 | 41.96 | -2.61 | 16.54 |
| **3** | conepaco(OH) |  | 37.88 | 10.29 | 10.29 | 5.44 | 9.26 | -0.09 | -0.70 | -35.31 | -0.01 | 40.62 | -0.68 | 19.35 |
|  | paco(H)1,2-alt(anti) |  | 36.53 | 8.94 | 8.52 | 5.67 | 7.71 | -0.21 | -0.78 | -34.53 | -0.01 | 40.49 | -0.81 | 19.00 |
|  | 1,2-alt(syn) paco(OH) |  | 35.87 | 8.28 | 6.85 | 5.65 | 7.98 | -0.20 | -0.74 | -36.53 | -0.01 | 40.53 | 0.45 | 18.74 |
|  | paco(H)1,3-alt |  | 37.96 | 10.38 | 9.95 | 5.65 | 9.05 | -0.12 | -0.70 | -34.49 | -0.01 | 40.75 | -1.43 | 19.27 |
|  |  | conepaco(H) | 32.02 | 4.43 | 4.43 | 5.34 | 8.41 | -0.16 | -0.75 | -34.09 | -0.02 | 41.08 | -5.99 | 18.20 |
|  |  | paco(H)1,2-alt(syn) | 30.40 | 2.82 | 2.39 | 5.38 | 7.33 | -0.23 | -0.79 | -35.91 | -0.01 | 41.01 | -4.70 | 18.34 |
|  |  | paco(OH)1,2-alt(anti) | 33.46 | 5.87 | 3.18 | 5.34 | 7.31 | -0.23 | -0.75 | -36.99 | -0.01 | 40.90 | -1.22 | 19.11 |
|  |  | paco(OH)1,3-alt | 33.74 | 6.15 | 3.46 | 5.41 | 8.12 | -0.18 | -0.73 | -36.52 | -0.01 | 41.30 | -2.03 | 18.40 |
| **4** | conepaco(OH) |  | 37.02 | 9.50 | 9.50 | 5.66 | 10.77 | -0.02 | -0.69 | -34.34 | -0.01 | 40.54 | -3.51 | 18.61 |
|  | paco(H)1,2-alt |  | 35.81 | 8.29 | 6.35 | 5.56 | 9.67 | -0.10 | -0.72 | -37.04 | -0.01 | 40.79 | -0.81 | 18.47 |
|  | paco(OH)1,3-alt |  | 38.60 | 11.08 | 10.50 | 5.59 | 9.77 | -0.08 | -0.70 | -33.96 | -0.01 | 40.69 | -1.99 | 19.29 |
|  |  | conepaco(H) | 31.64 | 4.12 | 4.12 | 5.23 | 7.95 | -0.19 | -0.72 | -37.40 | -0.01 | 41.35 | -3.09 | 18.53 |
|  |  | paco(OH)1,2-alt | 31.94 | 4.42 | 3.84 | 5.23 | 6.85 | -0.24 | -0.75 | -35.33 | -0.01 | 40.87 | -3.02 | 18.34 |
|  |  | paco(H)1,3-alt | 32.94 | 5.42 | 3.47 | 5.27 | 7.63 | -0.20 | -0.71 | -34.62 | -0.01 | 41.12 | -3.26 | 17.72 |
| **5** | conepaco(OH) |  | 40.15 | 10.40 | 10.00 | 5.26 | 9.06 | -0.10 | -0.69 | -34.18 | -0.01 | 39.59 | 0.05 | 21.16 |
|  | paco(prox)1,2-alt |  | 37.63 | 7.88 | 7.27 | 5.24 | 7.77 | -0.19 | -0.73 | -34.91 | -0.01 | 39.60 | 0.01 | 20.84 |
|  | paco(dist)1,3-alt |  | 39.71 | 9.95 | 9.95 | 5.46 | 9.08 | -0.12 | -0.70 | -33.03 | -0.01 | 39.70 | -1.65 | 20.99 |
|  |  | conepaco(dist) | 34.26 | 4.50 | 4.50 | 5.13 | 7.81 | -0.18 | -0.74 | -32.86 | -0.02 | 40.12 | -4.62 | 19.62 |
|  |  | conepaco(prox) | 33.10 | 3.34 | 2.95 | 5.10 | 7.74 | -0.19 | -0.71 | -36.02 | -0.02 | 40.39 | -3.12 | 19.91 |
|  |  | paco(dist)1,2-alt | 33.38 | 3.62 | 3.62 | 5.11 | 6.84 | -0.24 | -0.71 | -35.57 | -0.01 | 40.24 | -1.62 | 19.35 |
|  |  | paco(OH)1,2-alt | 33.01 | 3.26 | 2.52 | 5.02 | 6.54 | -0.25 | -0.73 | -35.39 | -0.01 | 40.06 | -2.16 | 19.91 |
|  |  | paco(prox)1,2-alt | 33.34 | 3.58 | 2.98 | 5.18 | 7.13 | -0.24 | -0.75 | -37.43 | -0.01 | 40.07 | -1.30 | 20.69 |
|  |  | paco(OH)1,3-alt | 34.86 | 5.11 | 4.38 | 5.13 | 7.56 | -0.19 | -0.73 | -32.84 | -0.01 | 40.19 | -3.58 | 19.34 |
|  |  | paco(prox)1,3-alt | 33.88 | 4.13 | 3.53 | 5.16 | 7.42 | -0.20 | -0.70 | -35.66 | -0.01 | 40.41 | -2.21 | 19.67 |

*a* The abbreviations denote the following: Etotal total energy; E energy difference relative to the lowest energy conformer; Erel energy difference relative to the starting conformer Ecomp bond stretching energy; Ebend angle bending energy; Ebb energy resulting from the bend-bend cross term; Esb energy resulting from the stretch-bend cross term; Etors torsional energy; E14vdw 1,4 van der Waals energy; Evdw van der Waals energy; Edipol electrostatic energy.

**Table S2.** Geometric parameters of the transition states of ring inversions in **2**-**5***a*

| compd | ring flips involving a | ring flips involving a | RMS*b* | bond angles*c* /° | | | | dihedral angles*d* /° | | | | | | | |
| --- | --- | --- | --- | --- | --- | --- | --- | --- | --- | --- | --- | --- | --- | --- | --- |
|  | phenol ring | phenyl ring |  | 1 | 2 | 3 | 4 | 1 | 1 | 2 | 2 | 3 | 3 | 4 | 4 |
| **2** | conepaco(prox) |  | 0.17 | 121.9 | 112.2 | 111.5 | 121.6 | -7 | 80 | -108 | 82 | -74 | 106 | -101 | 21 |
|  | conepaco(dist) |  | 0.02 | 123.8 | 122.1 | 111.8 | 111.9 | -72 | -8 | 8 | 75 | -102 | 79 | -80 | 101 |
|  | paco(H)1,2-alt |  | 0.49 | 112.2 | 112.1 | 120.1 | 115.5 | 96 | -95 | 107 | -64 | -27 | 100 | -40 | -67 |
|  | paco(H)1,3-alt |  | 0.08 | 119.6 | 120.7 | 113.6 | 114.3 | -92 | 16 | -12 | 89 | -64 | -59 | 64 | 59 |
|  | paco(prox)1,2-alt |  | 0.29 | 116.5 | 116.0 | 111.6 | 116.5 | 106 | -29 | -53 | 105 | -96 | 88 | -47 | -70 |
|  | paco(prox)1,3-alt |  | 0.25 | 121.9 | 114.1 | 112.4 | 119.3 | 7 | -82 | 62 | 60 | -70 | -51 | 100 | -26 |
|  | 1,2-altpaco(dist) |  | 0.25 | 112.1 | 118.4 | 112.5 | 121.1 | -74 | 111 | -51 | -43 | 86 | -100 | 79 | -1 |
|  |  | conepaco(H) | 0.12 | 110.7 | 111.0 | 117.8 | 120.0 | -109 | 80 | -73 | 111 | -97 | 11 | -4 | 85 |
|  |  | paco(prox)1,2-alt | 0.26 | 111.2 | 120.0 | 111.7 | 117.4 | 106 | -85 | 47 | 53 | -112 | 77 | -6 | -84 |
|  |  | paco(dist)1,3-alt | 0.00 | 115.0 | 112.7 | 117.6 | 119.5 | 56 | 68 | -61 | -63 | 92 | -10 | 9 | -89 |
| **3** | conepaco(OH) |  | 0.08 | 121.8 | 120.9 | 112.1 | 111.7 | -75 | -11 | 5 | 83 | -108 | 72 | -74 | 107 |
|  | paco(H)1,2- alt(anti) |  | 0.57 | 113.2 | 117.9 | 116.2 | 111.6 | 108 | -62 | -34 | 102 | -37 | -71 | 90 | -92 |
|  | 1,2-alt(syn) paco(OH) |  | 0.31 | 116.5 | 116.8 | 112.6 | 116.1 | 37 | -109 | 67 | 43 | -88 | 100 | -103 | 49 |
|  | paco(H)1,3-alt |  | 0.32 | 121.7 | 112.9 | 112.6 | 119.3 | -1 | -79 | 68 | 59 | -75 | -50 | 98 | -22 |
|  |  | conepaco(H) | 0.03 | 111.4 | 109.9 | 119.4 | 118.7 | -110 | 71 | -73 | 111 | -91 | 3 | -3 | 88 |
|  |  | paco(H)1,2-alt(syn) | 0.49 | 111.2 | 115.2 | 112.8 | 112.2 | -101 | 84 | -97 | 43 | 48 | -118 | 52 | 67 |
|  |  | paco(OH)1,2-alt(anti) | 0.38 | 115.5 | 111.5 | 113.0 | 116.0 | -54 | -57 | 95 | -90 | 105 | -64 | -20 | 102 |
|  |  | paco(OH)1,3-alt | 0.27 | 112.6 | 119.4 | 118.4 | 112.5 | -61 | -67 | 81 | 6 | 12 | -96 | 49 | 75 |
| **4** | conepaco(OH) |  | 0.06 | 123.4 | 111.8 | 111.9 | 120.8 | -4 | -75 | 107 | -75 | 73 | -108 | 84 | 1 |
|  | paco(H)1,2-alt |  | 0.45 | 116.1 | 111.8 | 122.6 | 111.7 | -74 | -32 | 103 | -77 | -12 | 82 | -86 | 99 |
|  | paco(OH)1,3-alt |  | 0.07 | 121.6 | 111.6 | 112.6 | 121.2 | 12 | -90 | 59 | 71 | -78 | -52 | 90 | -17 |
|  |  | conepaco(H) | 0.06 | 117.5 | 118.4 | 110.8 | 111.8 | -96 | 20 | -16 | 93 | -111 | 69 | -68 | 108 |
|  |  | paco(OH)1,2-alt | 0.25 | 114.5 | 111.2 | 113.4 | 115.2 | 70 | 45 | -89 | 93 | -100 | 62 | 13 | -104 |
|  |  | paco(H)1,3-alt | 0.17 | 117.5 | 118.1 | 113.9 | 115.0 | -89 | 7 | 3 | 86 | -75 | -45 | 53 | 58 |
| **5** | conepaco(OH) |  | 0.01 | 121.4 | 111.9 | 112.0 | 121.2 | 5 | 80 | -108 | 73 | -73 | 108 | -81 | -5 |
|  | paco(prox)1,2-alt |  | 0.46 | 112.3 | 112.0 | 115.3 | 120.5 | -79 | 97 | -83 | 98 | -70 | -38 | 89 | -8 |
|  | paco(dist)1,3-alt |  | 0.14 | 121.2 | 111.3 | 111.9 | 120.1 | -6 | 87 | -63 | -68 | 76 | 55 | -93 | 15 |
|  |  | conepaco(dist) | 0.09 | 111.0 | 118.3 | 119.6 | 110.2 | -71 | 110 | -94 | 6 | 0 | 86 | -111 | 74 |
|  |  | conepaco(prox) | 0.04 | 118.7 | 118.3 | 110.9 | 111.8 | -85 | 3 | -8 | 94 | -111 | 67 | -68 | 110 |
|  |  | paco(dist)1,2-alt | 0.11 | 114.9 | 114.9 | 116.2 | 112.8 | 102 | -43 | -29 | 112 | -88 | -11 | 68 | -105 |
|  |  | paco(OH)1,2-alt | 0.31 | 115.7 | 111.7 | 113.1 | 115.4 | -63 | -43 | 86 | -95 | 104 | -61 | -19 | 103 |
|  |  | paco(prox)1,2-alt | 0.39 | 111.7 | 112.3 | 116.4 | 112.9 | -104 | 72 | -91 | 87 | -8 | -89 | 53 | -107 |
|  |  | paco(OH)1,3-alt | 0.11 | 111.6 | 118.3 | 119.5 | 111.5 | -70 | -55 | 91 | -4 | -3 | -85 | 59 | 65 |
|  |  | paco(prox)1,3-alt | 0.38 | 112.7 | 113.4 | 117.6 | 118.4 | 74 | 48 | -67 | -48 | 90 | 0 | -23 | -73 |

*a* For the notation of conformers see text. *b* Deviation of the methylene carbon atoms from a mean plane. *c* 1: 1-2-3. 2: 7-8-9; 3: 13-14-15. 4: 19-20-21. *d* 1: 25-1-2-3; 1: 1-2-3-26; 2: 26-7-8-9; 2: 7-8-9-27; 3: 27-13-14-15; 3: 13-14-15-28; 4: 28-19-20-21; 4: 19-20-21-25

|  |
| --- |
|
|
|
|
|
|
